# Supplementary material for: A new and promiscuous α/β hydrolase from Acinetobacter tandoii DSM 14970 T inactivates the mycotoxin ochratoxin A
Source: Springer Nature journal article supplement (doi:10.1007/s00253-024-13073-x), 2024-02-23
Supplement: MOESM1 [file 253_2024_13073_MOESM1_ESM.pdf]

## Supplementary Material

### **A new and promiscuous $\alpha/\beta$ hydrolase from *Acinetobacter tandoii* DSM 14970<sup>T</sup> inactivates the mycotoxin ochratoxin A**

Ana Sánchez-Arroyo<sup>1</sup>, Laura Plaza-Vinuesa<sup>1</sup>, María Claudia Abeijón-Mukdsi<sup>1</sup>, Blanca de las Rivas<sup>1</sup>, José Miguel Mancheño<sup>2,\*</sup>, and Rosario Muñoz<sup>1,\*</sup>

<sup>1</sup> Institute of Food Science, Technology and Nutrition (ICTAN), CSIC, José Antonio Novais 6, 28040 Madrid, Spain

<sup>2</sup> Department of Crystallography and Structural Biology, Institute of Physical Chemistry Blas Cabrera, CSIC, Serrano 119, 28006 Madrid, Spain

\*Corresponding authors:

Rosario Muñoz  
[r.munoz@csic.es](mailto:r.munoz@csic.es)

José Miguel Mancheño  
[jm.mancheno@csic.es](mailto:jm.mancheno@csic.es)

Figure S1

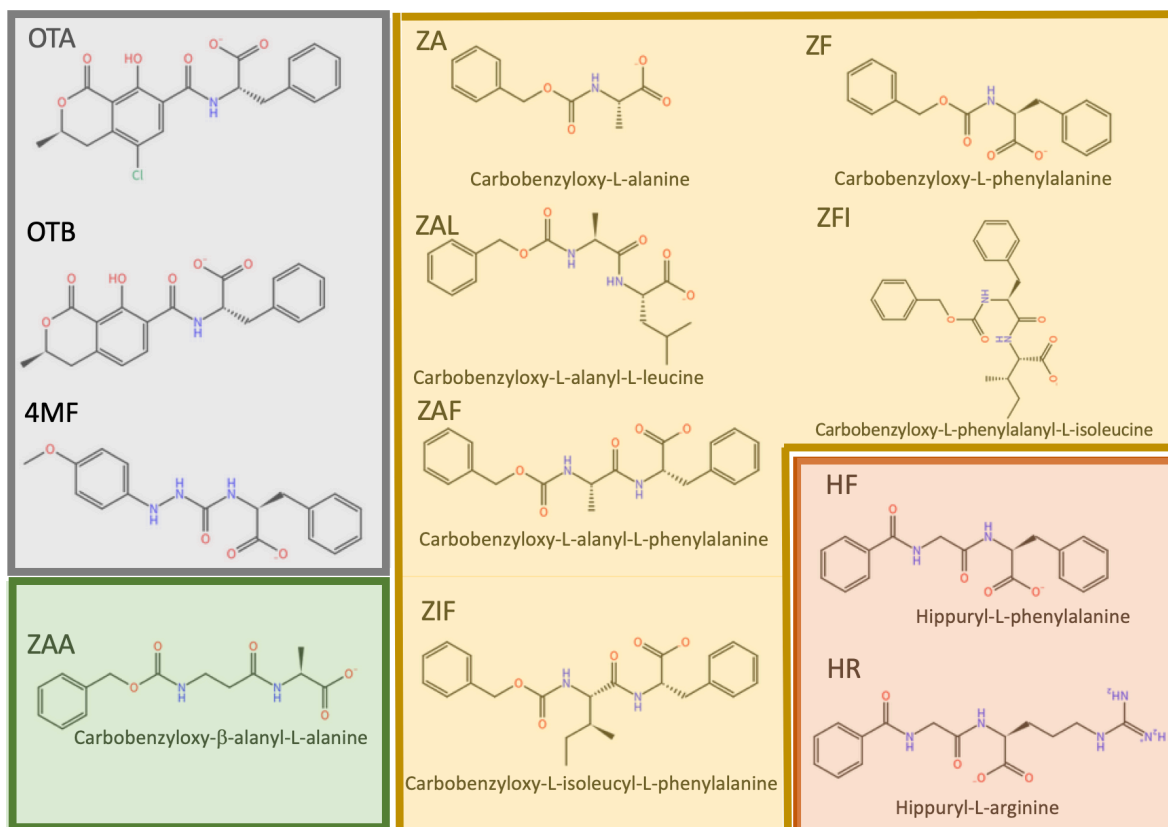

**Fig. S1** 2D structures of the synthetic carboxypeptidase substrates used in this work together with the structures of ochratoxins A and B, and its analog *N*-(4-methoxyphenylazoformyl)-phenylalanine (4MF).

Figure S2

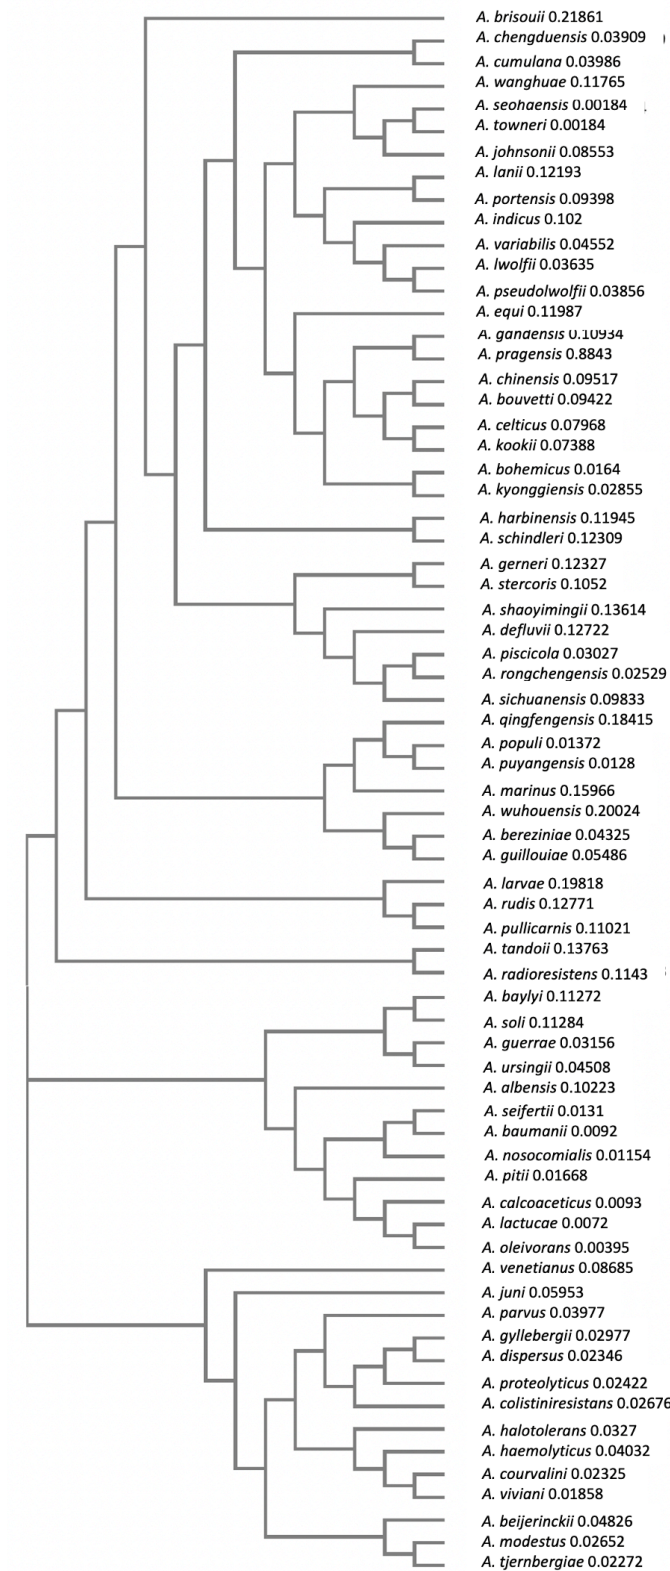

**Fig. S2** Cladogram showing the distribution of the *AtABH* hydrolase within the *Acinetobacter* genus (69 different species). Distances between sequences were calculated with Clustal Omega Software.

Figure S3

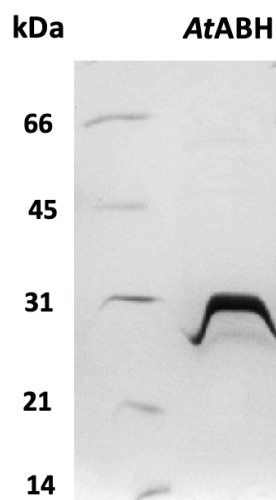

**Fig. S3** SDS-PAGE analysis of the purification of *AtABH* recombinant protein. The 12.5% gel was stained with Coomassie blue. Molecular mass markers are located on the left (SDS-PAGE standards, Bio-Rad).

Figure S4

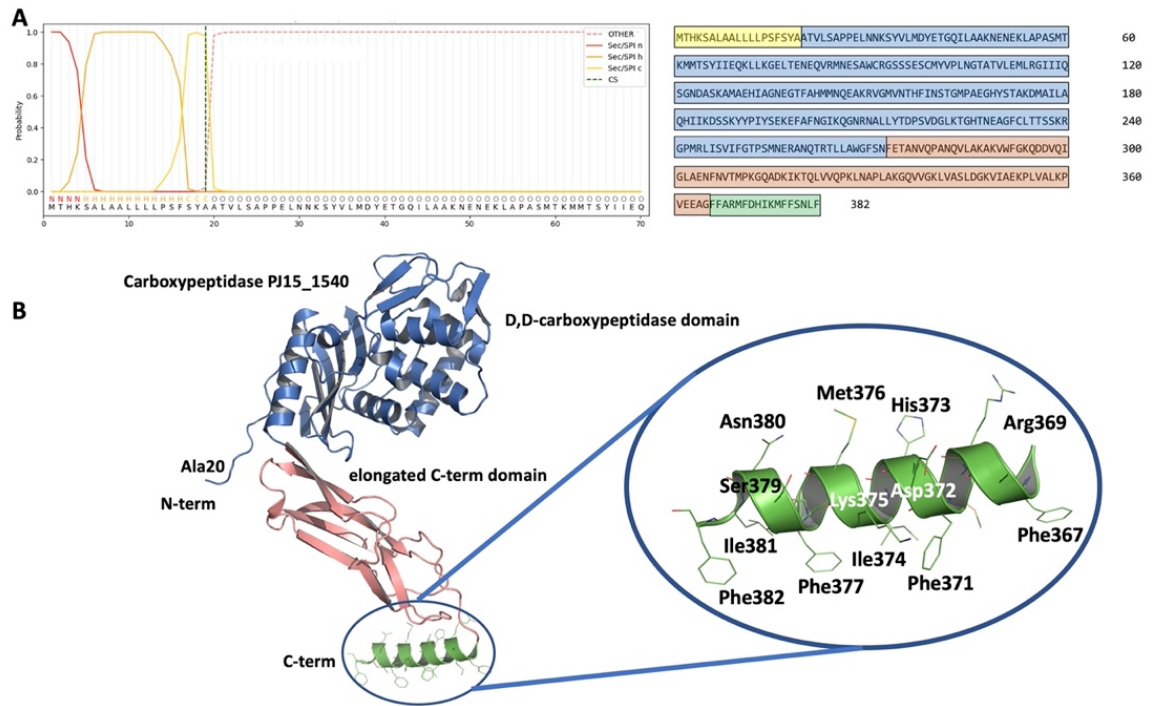

**Fig. S4** Predicted structure of the carboxypeptidase PJ15\_1540 from *Acinetobacter* sp. *negl*. The structural model of PJ15\_1540 obtained with AlphaFold2 reveals that the enzyme is a penicillin-binding protein with an N-terminal D,D-carboxypeptidase domain (blue ribbon), an elongated C-terminal domain (orange ribbon), and a C-terminal amphipathic  $\alpha$ -helix (green ribbon). The close-up view of this helix remarks its markedly amphipathic character, which is consistent with the putative membrane-associated nature of the protein.

## Table S1

**Table S1.** Structurally similar proteins to PJ15\_1540 determined with DALI

| Protein     | Z-score | rmsd (Å) | lali <sup>1</sup> | %id <sup>2</sup> |
|-------------|---------|----------|-------------------|------------------|
| <b>6osu</b> | 34.0    | 1.3      | 251               | 41               |
| <b>1xp4</b> | 30.7    | 1.6      | 245               | 27               |
| <b>1tvf</b> | 29.6    | 1.8      | 247               | 30               |
| <b>6muq</b> | 26.2    | 2.3      | 239               | 24               |

<sup>1</sup>lali: number of aligned residues; <sup>2</sup>%id: sequence identity to PJ15\_1540
